# Supplementary material for: Facile synthesis and superior supercapacitor performances of Ni2P/rGO nanoparticles
Source: Royal Society of Chemistry journal article supplement (doi:10.1039/c3ra00079f), 2013-01-01
Supplement: c3ra00079f.pdf [file c3ra00079f.pdf]

## Facile synthesis and superior supercapacitor performances of

### Ni<sub>2</sub>P/rGO Nanoparticles

Corresponding author. Yijing Wang\*

Institute of New Energy Material Chemistry, Key Laboratory of Advanced Energy Materials Chemistry (MOE), *Tianjin Key Lab on Metal and Molecule-based Material Chemistry*, Nankai University, Tianjin 300071, P.R. China  
Email address: wangyj@nankai.edu.cn

## Experimental Section

### *Synthesis*

All chemicals were of analytical grade and used without further purification. Graphene oxide (GO) was made via a modified Hummers method.<sup>1,2</sup> The Ni<sub>2</sub>P/rGO composites were synthesized via two steps. Step 1, the synthesis of the precursor was reported in the previous literatures.<sup>3-7</sup> Step 2, in a typical synthesis of Ni<sub>2</sub>P/rGO composites, 5 mg GO and 0.3 g the precursor were dispersed in 20ml distilled water and subjected to ultrasonic vibration to form a homogeneous suspension, respectively. The two former suspensions were homogeneously mixed with each other and subjected to ultrasonic vibration for a while, named as M1. The 1.03 g NaH<sub>2</sub>PO<sub>2</sub> · H<sub>2</sub>O was dispersed in 20 ml distilled water and mixed with M1. Then, the mixture was calcined at 500 °C for 1 h and cooled to room temperature under a flow of Ar (99.999%). The solid obtained was washed thoroughly with distilled water and absolute ethyl alcohol to remove the by-products. After that, the wet products were dried at 80°C for 12h in a vacuum oven.

Pure Ni<sub>2</sub>P nanoparticles were synthesized by the same method as described above to make Ni<sub>2</sub>P/rGO composite, except that there was no GO involved.

### *Characterization*

The crystal structure and surface configuration of samples was determined by powder X-ray diffraction (XRD, Rigaku D/Max-2500, Cu K $\alpha$  radiation), scanning

electron microscope (SEM, JEOL JSM-6700F Field Emission) , transmission electron microscope (TEM) and high-resolution transmission electron microscope (HR-TEM) on a JEOL JEM-2100 TEM. The electronic states of the as-prepared products were investigated by X-ray photoelectron spectroscopy (XPS, PHI5000VersaProbe).

### *Electrochemical measurements*

For electrochemical measurements, the working electrodes were constructed by mixing the active material, acetylene black, graphite and Polyvinylidene Fluoride (PVDF) binder in a weight ratio of 70:20:5:5. This mixture was then pressed onto the nickel foam electrode (1.0 cm×1.0 cm), and dried under vacuum at 80°C for 10 h. Then, electrochemical measurements were conducted in a three compartment cell using a LAND battery test instrument (CT2001A). A nickel foam and saturated calomel electrode (SCE) electrode were used as a counter electrode and reference electrode, respectively. The electrolyte was a 2 M KOH aqueous solution. Cyclic voltammetry (CV) was conducted by a Zahner IM6e electrochemical workstation with voltage scan rates of 1 mV s<sup>-1</sup>, 5 mV s<sup>-1</sup>, 10 mV s<sup>-1</sup>, 20 mV s<sup>-1</sup> and 50 mV s<sup>-1</sup>. The galvanostatic charge-discharge tests were conducted at the current of 1 mA cm<sup>-2</sup>, 5 mA cm<sup>-2</sup>, 10 mA cm<sup>-2</sup>, 20 mA cm<sup>-2</sup> and 50 mA cm<sup>-2</sup>.

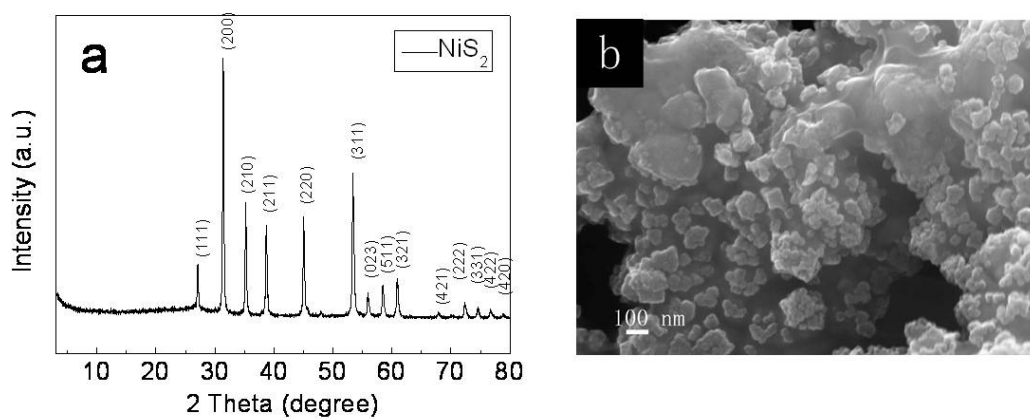

**Fig.S1.** XRD pattern (a) and SEM image (b) of the precursor NiS<sub>2</sub>.

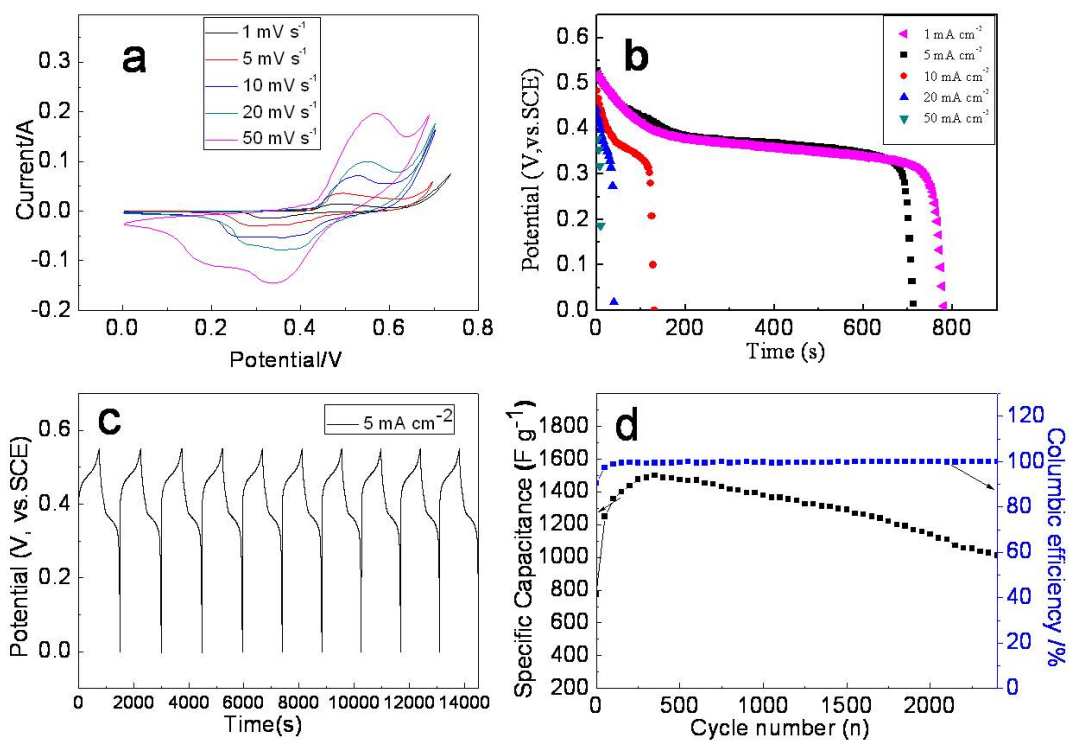

**Fig.S2.** Electrochemical characterizations of Ni<sub>2</sub>P electrode. (a) CV curves of Ni<sub>2</sub>P electrode at various scan rates. (b) Galvanostatic discharge curves of Ni<sub>2</sub>P electrode at various discharge current densities. (c) Galvanostatic charge and discharge curves of Ni<sub>2</sub>P electrode at a current density of 5 mA cm<sup>-2</sup>. (d) Dependences of the discharge specific capacitance and the coulombic efficiency on the charge-discharge cycle numbers. The charge-discharge tests were performed at 5 mA cm<sup>-2</sup> in 2 M KOH solution.

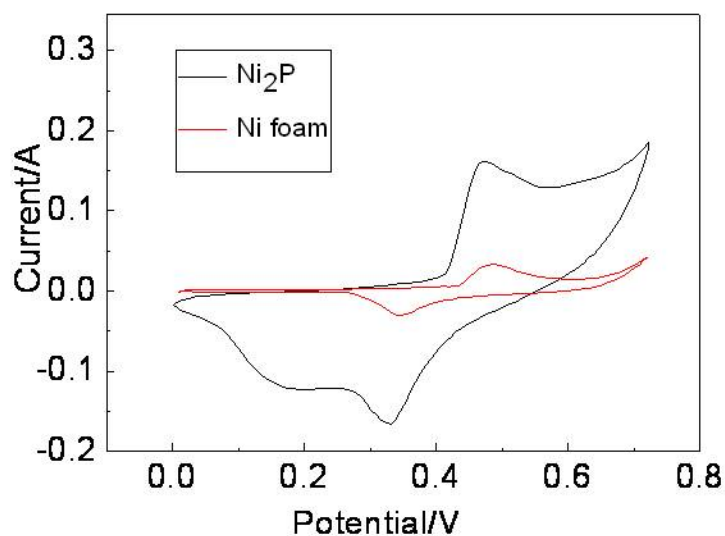

**Fig.S3.** The curves of Ni foam with and without loading of Ni<sub>2</sub>P nanoparticles, 50 mV s<sup>-1</sup>.

## Reference

1. W. S. Hummers and R. E. Offeman, *J. Am. Chem. Soc.*, 1958, **80**, 1339-1339.
2. X. Sun, Z. Liu, K. Welscher, J. Robinson, A. Goodwin, S. Zaric and H. Dai, *Nano Res.*, 2008, **1**, 203-212.
3. J. Madarasz, P. Bombicz, M. Okuya and S. Kaneko, *Solid State Ionics*, 2001, **141**, 439-446.
4. P. Bombicz, I. Mutikainen, M. Krunk, T. Leskelä, J. Madarász and L. Niinistö, *Inorg. Chim. Acta*, 2004, **357**, 513-525.
5. J. Madarász, P. Bombicz, M. Okuya, S. Kaneko and G. Pokol, *Solid State Ionics*, 2004, **172**, 577-581.
6. S. Selvakumar, K. Rajarajan, S. M. R. Kumar, I. V. Potheher, D. P. Anand, K. Ambujam and P. Sagayaraj, *Cryst. Res. Technol.*, 2006, **41**, 766-770.
7. J. Madarasz and G. Pokol, *J. Therm. Anal. Calorim.*, 2007, **88**, 329-336.
